# Supplementary material for: Gene Mining and Flavour Metabolism Analyses of Wickerhamomyces anomalus Y-1 Isolated From a Chinese Liquor Fermentation Starter
Source: Frontiers journal article supplement (doi:10.3389/fmicb.2022.891387), 2022-05-02
Supplement: Table_1.XLS [file Table_1.XLS]

## Sheet: Sheet1
Supplementary Table S1. Flavored components of W. anomalus Y-1 under liquid fermentation
Kind	Designation	CAS No.	Relative percentage/%
Ester	Ethyl butyrate	105-54-4	0.165±0.002
	Isoamyl acetate	123-92-2	0.192±0.008
	Ethyl valerate	539-82-2	0.221±0.01
	Ethyl hexanoate	123-66-0	49.526±1.958
	Hexyl acetate	142-92-7	0.1±0.01
	Propyl hexanoate	626-77-7	0.47±0.017
	Ethyl heptanoate	106-30-9	2.042±0.138
	Isobutyl hexanoate	105-79-3	0.247±0.011
	Butyl hexanoate	626-82-4	1.373±0.011
	Hexyl butanoate	2639-63-6	0.48±0.040
	Ethyl caprylate	106-32-1	8.491±0.101
	Isopentyl hexanoate	2198-61-0	1.249±0.017
	Hexanoic acid, pentyl ester	540-07-8	0.368±0.006
	Ethyl nonanoate	123-29-5	0.078±0.010
	Hexyl hexanoate	6378-65-0	3.355±0.032
	Ethyl caprate	110-38-3	0.177±0.010
	Ethyl phenylacetate	101-97-3	0.149±0.003
	Phenethyl acetate	103-45-7	1.335±0.010
	Ethyl hydrocinnamate	2021-28-5	0.446±0.023
	Ethyl myristate	124-06-1	0.348±0.011
	Pentadecanoic acid,ethyl ester	41114-00-5	0.058±0.011
	Ethyl palmitate	628-97-7	11.713±0.580
	E-11-Hexadecenoic acid, ethyl ester	-	0.274±0.011
	(E)-9-Octadecenoic acid ethyl ester	6114-18-7	2.863±0.087
	9,12-Octadecadienoic acid, ethyl ester	-	2.654±0.011
Alcohol	1-Propanol	71-23-8	0.066±0.005
	2-Methyl-1-propanol	78-83-1	0.114±0.005
	2-Ethylhexanol	104-76-7	0.112±0.001
	1-Nonanol	143-08-8	0.164±0.007
	1-Hexadecanol	36653-82-4	0.076±0.006
	Phenylethyl alcohol	1960-12-08	6.872±0.122
	3-Methyl-1-butanol	123-51-3	2.711±0.094
Acid	Acetic acid	64-19-7	0.134±0.001
	Hexanoic acid	142-62-1	0.288±0.013
	Octanoic acid	124-07-2	0.114±0.009
Aldehydes	1-Nonanal	124-19-6	0.146±0.004
	Decanal	112-31-2	0.07±0.001
	Benzaldehyde	100-52-7	0.125±0.011
Alkanes	Pentadecane	629-62-9	0.126±0.008
	Pentyl-Cyclopropane	-	0.094±0.002
Rests	Hexanoic acid, anhydride	2051-49-2	0.074±0.001
	Phenol	108-95-2	0.104±0.002
The results are the average and error of triplicate experiments.
